# Supplementary material
Source: PubMed Central journal article supplement (PMC5548143)
Supplement: NIHMS879213-supplement-Supplementary_file.pdf [file NIHMS879213-supplement-Supplementary_file.pdf]

**Supplementary Table 1**

|                                               | <b>Non-Participants<br/>N=119<br/>Mean (<math>\pm</math> 50) or<br/>N (%)</b> | <b>Participants<br/>N=36<br/>Mean (<math>\pm</math> SD)<br/>or N (%)</b> | <b>P-value</b> |
|-----------------------------------------------|-------------------------------------------------------------------------------|--------------------------------------------------------------------------|----------------|
| Age at Screening (years)                      | 61.3 ( $\pm$ 11.8)                                                            | 59.5 ( $\pm$ 11.0)                                                       | 0.41           |
| Gender (% Male)                               | 64 (53.8%)                                                                    | 18 (50.0%)                                                               | 0.71           |
| Familial ALS (%)                              | 11 (9.5%)                                                                     | 5 (14.7%)                                                                | 0.36           |
| Bulbar Onset (%)                              | 24 (20.7%)                                                                    | 10 (27.8%)                                                               | 0.37           |
| Riluzole use (%)                              | 45 (38.5%)                                                                    | 13 (38.2%)                                                               | 1.00           |
| Antidepressant Use (%)                        | 19 (16.2%)                                                                    | 8 (22.9%)                                                                | 0.45           |
| Time from symptom onset to diagnosis (months) | 19.3 ( $\pm$ 26.7)                                                            | 13.3 ( $\pm$ 19.2)                                                       | 0.15           |
| Time from diagnosis to screening (months)     | 15.0 ( $\pm$ 22.1)                                                            | 25.5 ( $\pm$ 38.7)                                                       | 0.13           |
| ADI-12                                        | 20.0 ( $\pm$ 5.4)                                                             | 19.8 ( $\pm$ 6.5)                                                        | 0.85           |

**Supplementary Table 1:** Baseline clinical and demographic characteristics of participants and non-participants in the longitudinal study. (Results are shown as mean ( $\pm$  standard deviation). Continuous variables were compared between participants and non-participants using a Student T-test. Class variables were compared using Fisher's exact test. ADI-12: ALS Depression Inventory. Antidepressant use is defined as any antidepressant prescribed for the specific purpose of treating depression).

**Supplementary Table 2**

| <b>Scale</b> | <b>Scale</b> | <b>Spearman Correlation Coefficient</b> | <b>P Value</b> |
|--------------|--------------|-----------------------------------------|----------------|
| ADI-12       | BHS          | 0.58                                    | <0.01          |
| ADI-12       | ALSSQOL      | -0.66                                   | <0.01          |
| BHS          | ALSSQOL      | -0.72                                   | <0.01          |

**Supplementary Table 2:** Spearman correlation coefficients between baseline depression, hopelessness and quality of life. (ADI-12: ALS Depression Inventory; BHS: Beck Hopelessness Scale; ALSSQOL: ALS-specific Quality of Life).
